# Supplementary material for: Differential microRNA Expression in Porcine Endometrium Involved in Remodeling and Angiogenesis That Contributes to Embryonic Implantation
Source: Front Genet. 2019 Jul 26;10:661. doi: 10.3389/fgene.2019.00661 (PMC6677090; doi:10.3389/fgene.2019.00661)
Supplement: Supplementary Table 1 — Primer sequences for qPCR. [file Table_1.xls]

## Sheet: mature
Supplementary Table 1 The mature miRNA and primer sequences
A. The mature miRNA sequences
miRNA name	mature miRNA sequence		size (bp)
miR-1	UGGAAUGUAAAGAAGUAUGUA		21
miR-183	UAUGGCACUGGUAGAAUUCACUG		23
miR-143-3p	UGAGAUGAAGCACUGUAGCUC		21
miR-148a	UCAGUGCACUACAGAACUUUGU		22
miR-206	UGGAAUGUAAGGAAGUGUGUGA		22
miR-378	ACUGGACUUGGAGUCAGAAGGC		22
miR-192	CUGACCUAUGAAUUGACAGCC		21
miR-574	CACGCUCAUGCACACACCCACA		22
miR-455	GCAGUCCAUGGGCAUAUACAC		21
miR-486	UCCUGUACUGAGCUGCCCCGAG		22
miR-151-5p	UCGAGGAGCUCACAGUCUAGU		21
miR-339-5p	UCCCUGUCCUCCAGGAGCUCAC		22
B. The primer sequences of the stem-loop qPCR experiments
miRNA name	Primer	Primer sequence	Annealing (℃)	Product size (bp)
miR-1	Loop	CTCAACTGGTGTCGTGGAGTCGGCAATTCAGTTGAGCAGTGAAT	65	71
	FW Primer	ACACTCCAGCTGGGTGGAATGTAAAGAAGTAT
	RW Primer	CTCAACTGGTGTCGTGGA
miR-183	Loop	CTCAACTGGTGTCGTGGAGTCGGCAATTCAGTTGAGCAGTGAAT	65	73
	FW Primer	ACACTCCAGCTGGGTATGGCACTGGTAGAATT
	RW Primer	CTCAACTGGTGTCGTGGA
miR-143-3p	Loop	CTCAACTGGTGTCGTGGAGTCGGCAATTCAGTTGAGGAGCTAC	65	71
	FW Primer	ACACTCCAGCTGGGTGAGATGAAGCACTGTA
	RW Primer	CTCAACTGGTGTCGTGGA
miR-148a	Loop	CTCAACTGGTGTCGTGGAGTCGGCAATTCAGTTGAGACAAAGTTCT	65	72
	FW Primer	ACACTCCAGCTGGGTCAGTGCACTACAGAAC					6
	RW Primer	CTCAACTGGTGTCGTGGA
miR-206	Loop	CTCAACTGGTGTCGTGGAGTCGGCAATTCAGTTGAGTCACACACT	65	72
	FW Primer	ACACTCCAGCTGGGTGGAATGTAAGGAAGTGT
	RW Primer	CTCAACTGGTGTCGTGGA
miR-378	Loop	CTCAACTGGTGTCGTGGAGTCGGCAATTCAGTTGAGGCCTTCT	65	72
	FW Primer	ACACTCCAGCTGGGACTGGACTTGGAGTCAGA
	RW Primer	CTCAACTGGTGTCGTGGA
miR-192	Loop	CTCAACTGGTGTCGTGGAGTCGGCAATTCAGTTGAGGGCTGTC	65	71
	FW Primer	ACACTCCAGCTGGGCTGACCTATGAATTGAC
	RW Primer	CTCAACTGGTGTCGTGGA
miR-574	Loop	CTCAACTGGTGTCGTGGAGTCGGCAATTCAGTTGAGTGTGGGT	65	72
	FW Primer	ACACTCCAGCTGGGCACGCTCATGCACACACC
	RW Primer	CTCAACTGGTGTCGTGGA
miR-455	Loop	CTCAACTGGTGTCGTGGAGTCGGCAATTCAGTTGAGGTGTATA	65	71
	FW Primer	ACACTCCAGCTGGGGCAGTCCATGGGCATATA
	RW Primer	CTCAACTGGTGTCGTGGA
miR-486	Loop	CTCAACTGGTGTCGTGGAGTCGGCAATTCAGTTGAGCTCGGGGC	65	72
	FW Primer	ACACTCCAGCTGGGTCCTGTACTGAGCTGCCC
	RW Primer	CTCAACTGGTGTCGTGGA
miR-151-5p	Loop	CTCAACTGGTGTCGTGGAGTCGGCAATTCAGTTGAGACTAGAC	65	71
	FW Primer	ACACTCCAGCTGGGTCGAGGAGCTCACAGTC
	RW Primer	CTCAACTGGTGTCGTGGA
miR-339-5p	Loop	CTCAACTGGTGTCGTGGAGTCGGCAATTCAGTTGAGGTGAGCTC	65	72
	FW Primer	ACACTCCAGCTGGGTCCCTGTCCTCCAGGAG
	RW Primer	CTCAACTGGTGTCGTGGA
U6-snRNA	FW Primer	CTCGCTTCGGCAGCACA	65	94
	RW Primer	AACGCTTCACGAATTTGCGT

## Sheet: novel
Supplementary Table 1 The novel miRNA and primer sequences
A. The novel miRNA sequences
miRNA name	mature miRNA sequence		size(bp)
ssc-novel00004	UGAGGUAGUAGAUUGUAUAGUUG		23
ssc-novel00017	AGGCAAGAUGCUGGCAUAGCUG		22
ssc-novel00020	CUGGUUUCACAUGGUGGCUUAGA		23
ssc-novel00021	AAACAUCUGGUUGGUUGAGAGA		22
B. The primer sequences of the stem-loop qPCR experiments
miRNA name	Primer	Primer sequence	Annealing (℃)	Product size (bp)
ssc-novel00004	Loop	CTCAACTGGTGTCGTGGAGTCGGCAATTCAGTTGAGCAACTATA	65	73
	FW Primer	ACACTCCAGCTGGGTGAGGTAGTAGATTGTATA
	RW Primer	CTCAACTGGTGTCGTGGA
ssc-novel00017	Loop	CTCAACTGGTGTCGTGGAGTCGGCAATTCAGTTGAGCAGCTAT	65	72
	FW Primer	ACACTCCAGCTGGGAGGCAAGATGCTGGCATAG
	RW Primer	CTCAACTGGTGTCGTGGA
ssc-novel00020	Loop	CTCAACTGGTGTCGTGGAGTCGGCAATTCAGTTGAGTCTAAGCC	65	73
	FW Primer	ACACTCCAGCTGGGCTGGTTTCACATGGTGGCT
	RW Primer	CTCAACTGGTGTCGTGGA
ssc-novel0002	Loop	CTCAACTGGTGTCGTGGAGTCGGCAATTCAGTTGAGTCTCTCAA	65	72
	FW Primer	ACACTCCAGCTGGGAAACATCTGGTTGGTTGA
	RW Primer	CTCAACTGGTGTCGTGGA
